# Supplementary material for: Inclusion of Red Macroalgae (Asparagopsis taxiformis) in Dairy Cow Diets Modulates Feed Intake, Chewing Activity and Estimated Saliva Secretion
Source: MDPI journal article supplement (doi:10.3390/ani13030489), 2023-01-31

### Supplementary figure legend:

#### Figure S1:

The relationship between recorded freshwater intake and daily dry matter intake by early lactation Norwegian red dairy cows given *ad libitum* access to total mixed ration and drinking water (Solid common regression line,  $\text{FWI (L/d)} = 0.58 + 3.61 \cdot \text{DMI (kg/d)}$ , Root MSE = 9.71;  $R^2 = 0.45$ ,  $P < 0.0001$ ; dark triangle = Control; blue circle = 0.125% AT, and red diamond = 0.25% AT).

Figure S1.

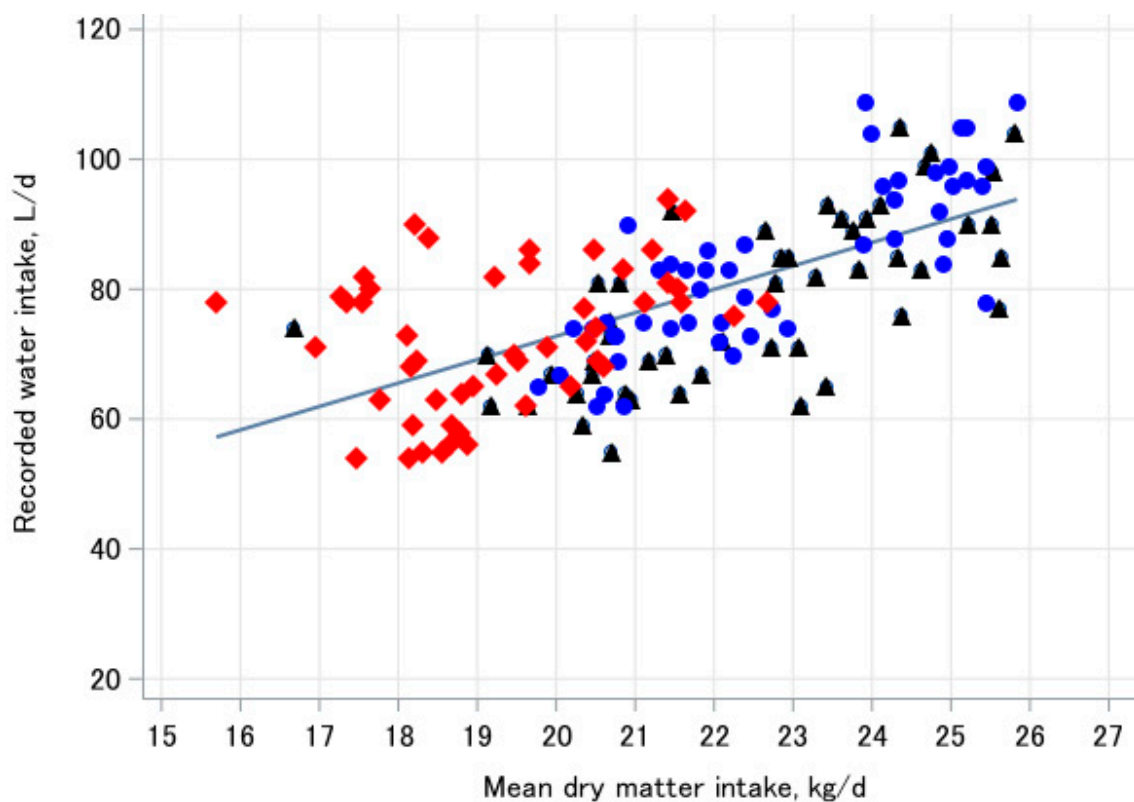

Supplement: s1 [file s1]
